# Supplementary material for: A comprehensive DFT study on the sensing abilities of cyclic oligothiophenes (nCTs)
Source: Royal Society of Chemistry journal article supplement (doi:10.1039/c9nj01894h), 2019-01-01
Supplement: c9nj01894h1.pdf [file c9nj01894h1.pdf]

## **A comprehensive DFT study on sensing abilities of cyclic oligothiophenes**

**(nCT)**

Hasnain Sajid, Khurshid Ayub, Tariq Mahmood\*

Department of Chemistry, COMSATS University, Abbottabad Campus, Abbottabad-22060,  
Pakistan

\*To whom correspondence can be addressed: E-mail: mahmood@cuiatd.edu.pk (T. M)

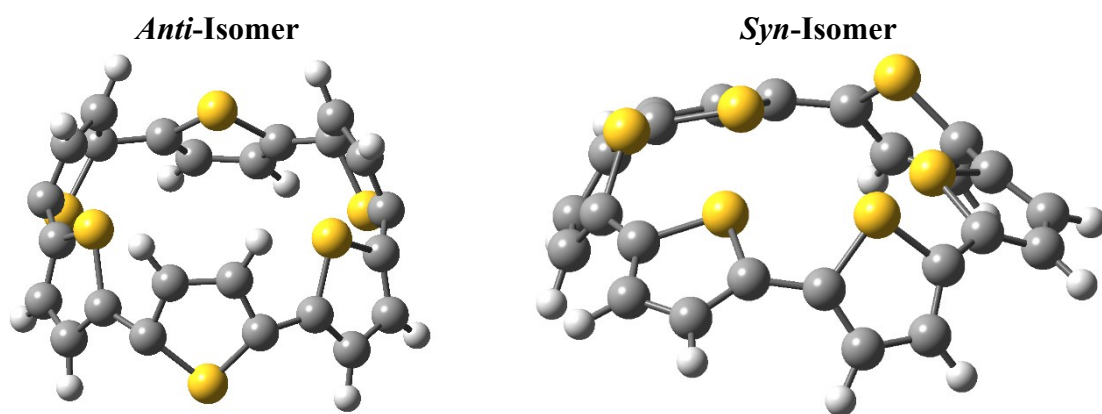

**Figure S1a.** Structures of anti- and syn-isomers of cyclic oligothiophene.

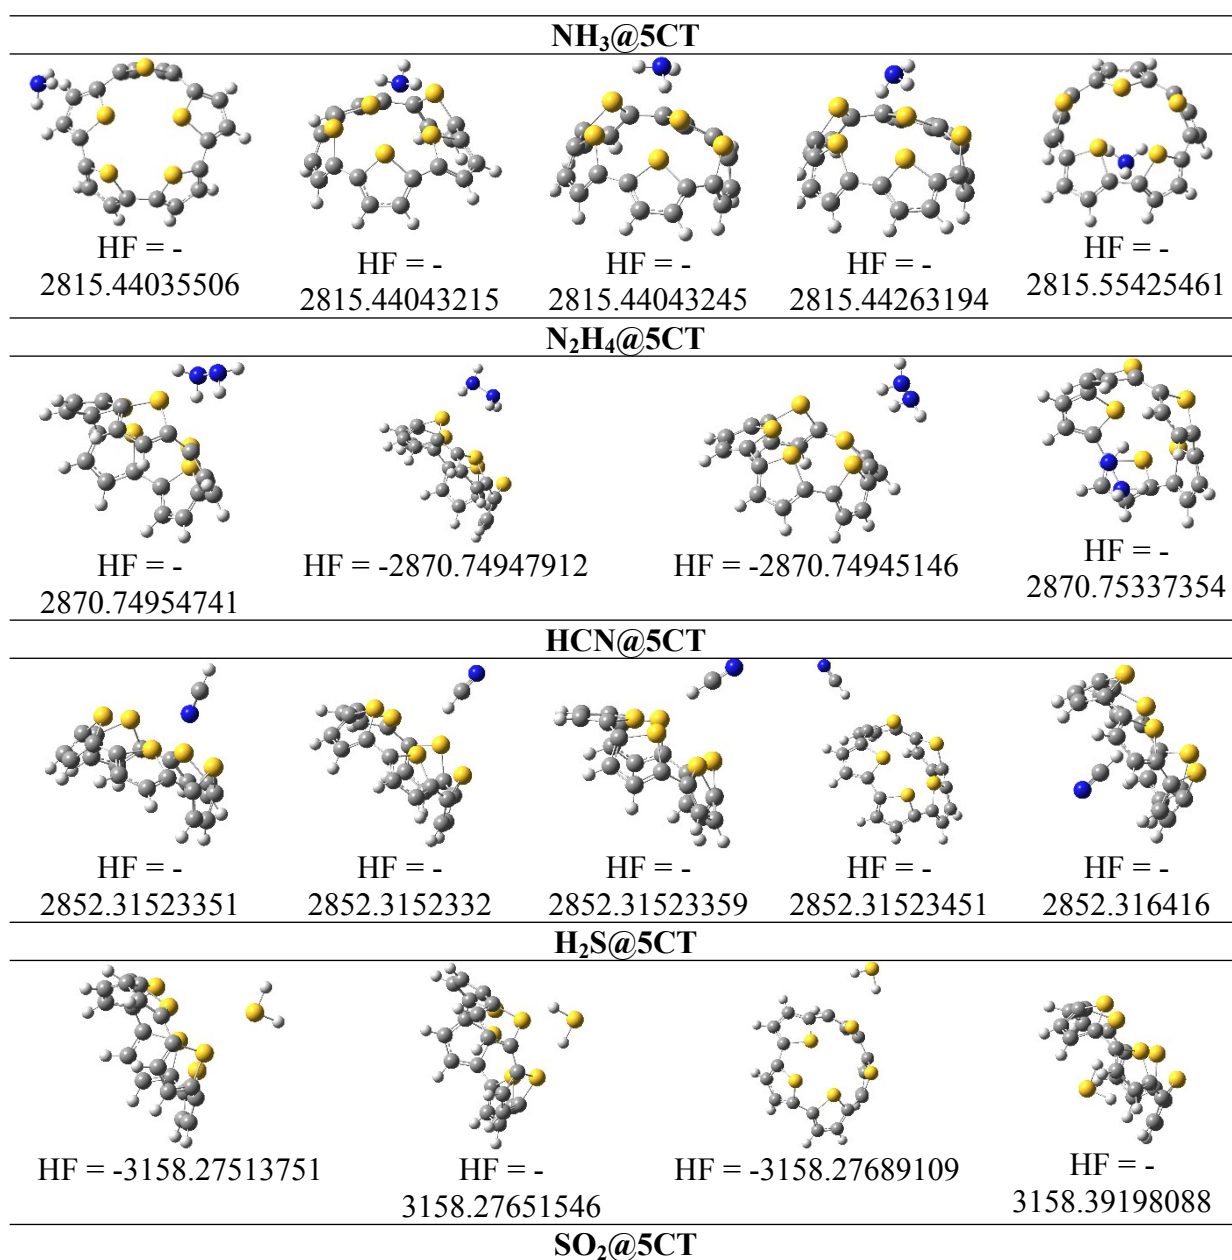

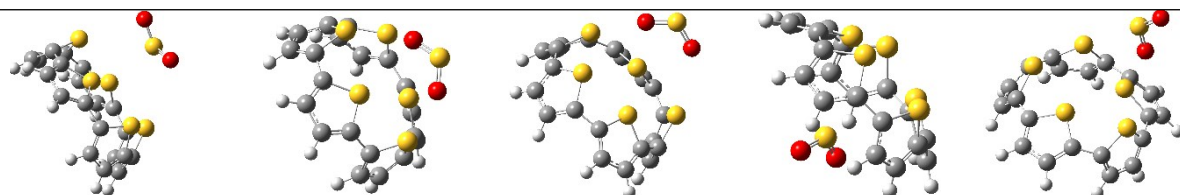

HF = -  
3307.47996333      HF = -  
3307.47952844      HF = -  
3307.47952844      HF = -  
3307.4831405      HF = -  
3307.48326389

**SO<sub>3</sub>@5CT**

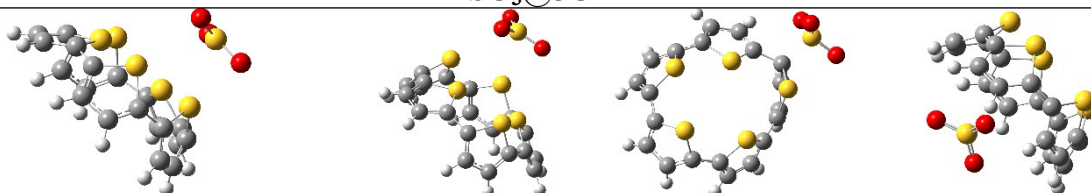

HF = -3382.65555663      HF = -  
3382.65249989      HF = -  
3382.68890325      HF = -  
3382.66411207

**CO<sub>2</sub>@5CT**

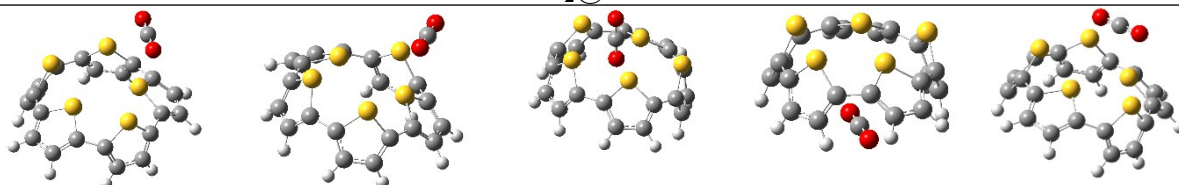

HF = -  
2947.47236607      HF = -  
2947.47236599      HF = -  
2947.47193746      HF = -  
2947.47302084      HF = HF = -  
2947.47192

**CO@5CT**

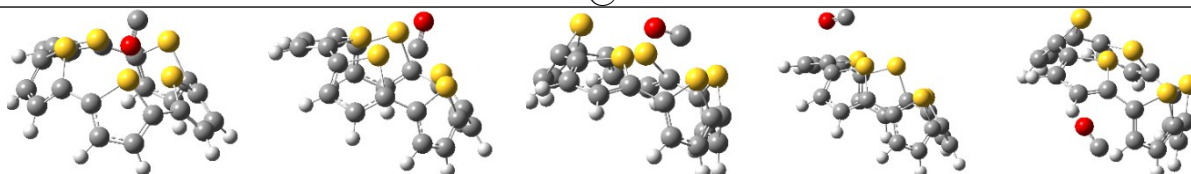

HF = -  
2872.20002584      HF = -  
2872.20005746      HF = -  
2872.20003480      HF = -  
2872.19995561      HF = -  
2872.200507

**H<sub>2</sub>O<sub>2</sub>@5CT**

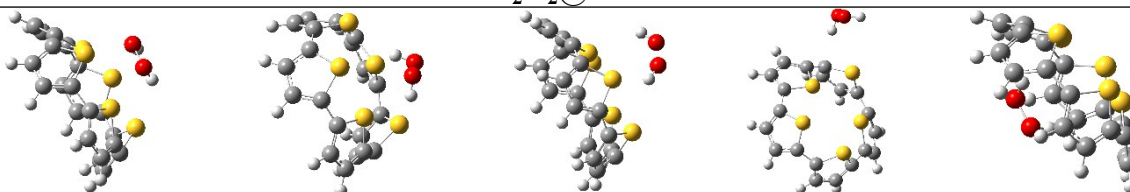

HF = -  
2910.42930128      HF = -  
2910.42930178      HF = -  
2910.429096      HF = -  
2910.4286791      HF = -  
2910.54934016

**H<sub>2</sub>O@5CT**

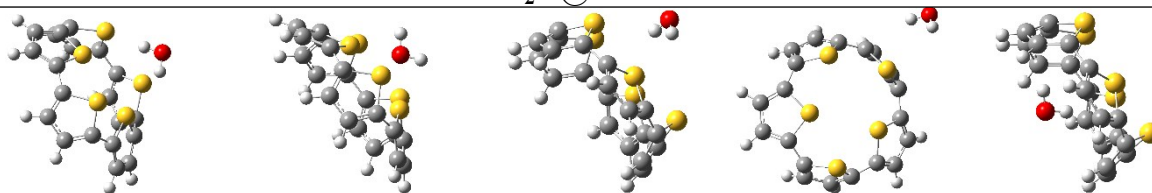

HF = -  
2835.30414092      HF = -  
2835.30414092      HF = -  
2835.30414088      HF = -  
2835.30329189      HF = -  
2835.3069489

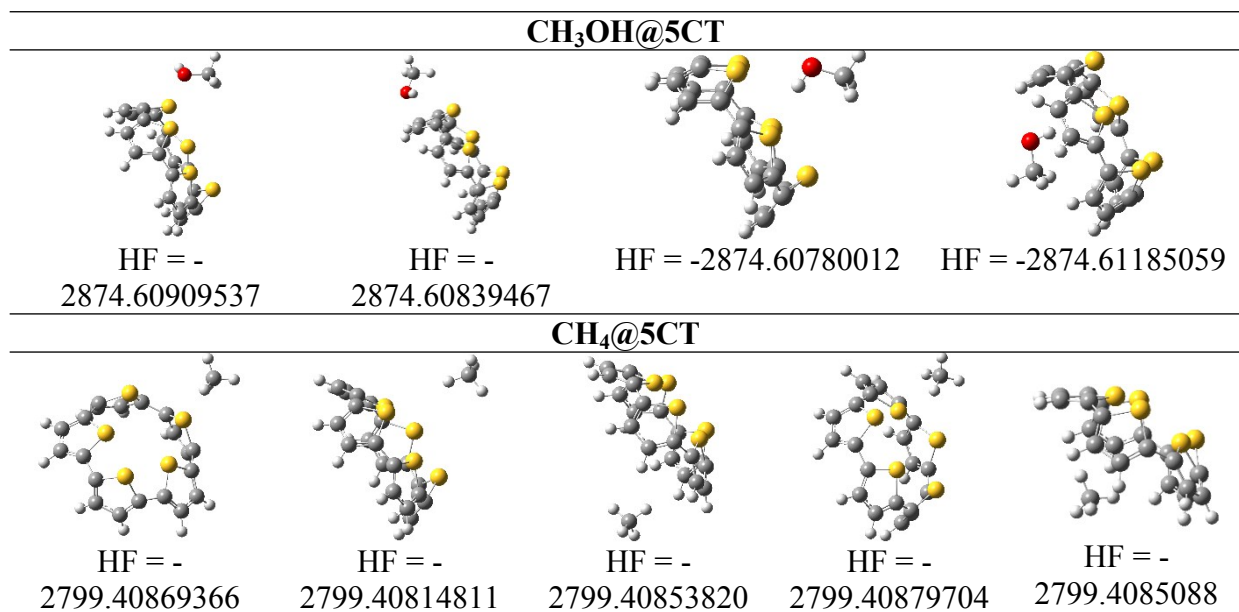

**Figure S2a.** Optimized geometries of analytes@5CT complexes

---

**NH<sub>3</sub>@6CT**

---

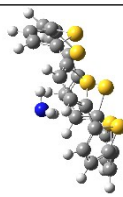

HF = -  
3367.30838214

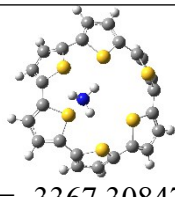

HF = -3367.30847200

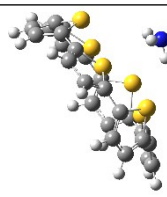

HF = -  
3367.30689141

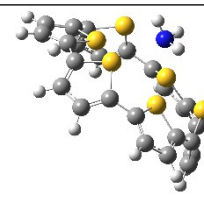

HF = -3367.30627441

---

**N<sub>2</sub>H<sub>4</sub>@6CT**

---

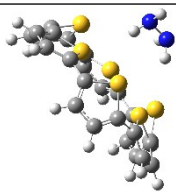

HF = -3422.61579906

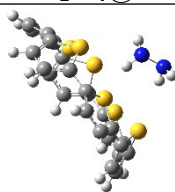

HF = -3422.61605595

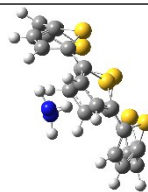

HF = -3422.61605582

---

**HCN@6CT**

---

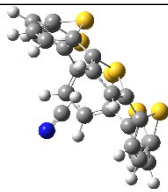

HF = -  
3404.18400642

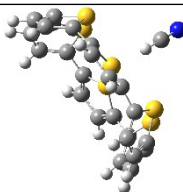

HF = -  
3404.17729849

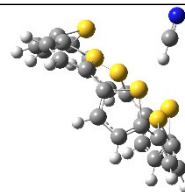

HF = -3404.18144858

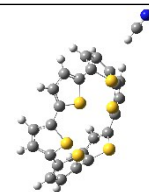

HF = -  
3404.18252579

---

**H<sub>2</sub>S@6CT**

---

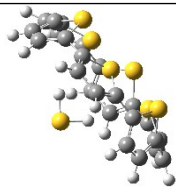

HF = -3710.14408371

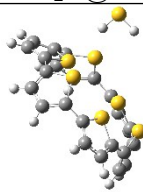

HF = -3710.14265945

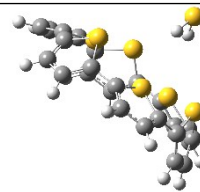

HF = -3710.14256426

---

**SO<sub>2</sub>@6CT**

---

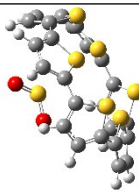

HF = -3859.34869136

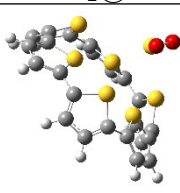

HF = -3859.34629632

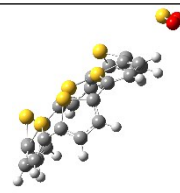

HF = -3859.34901495

---

**SO<sub>3</sub>@6CT**

---

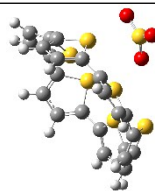

HF = -  
3934.51866697

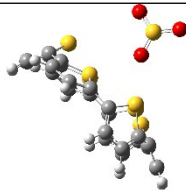

HF = -  
3934.51587227

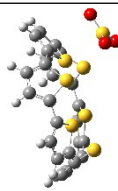

HF = -3934.52131815

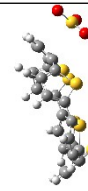

HF = -3934.52350546

---

**CO<sub>2</sub>@6CT**

---

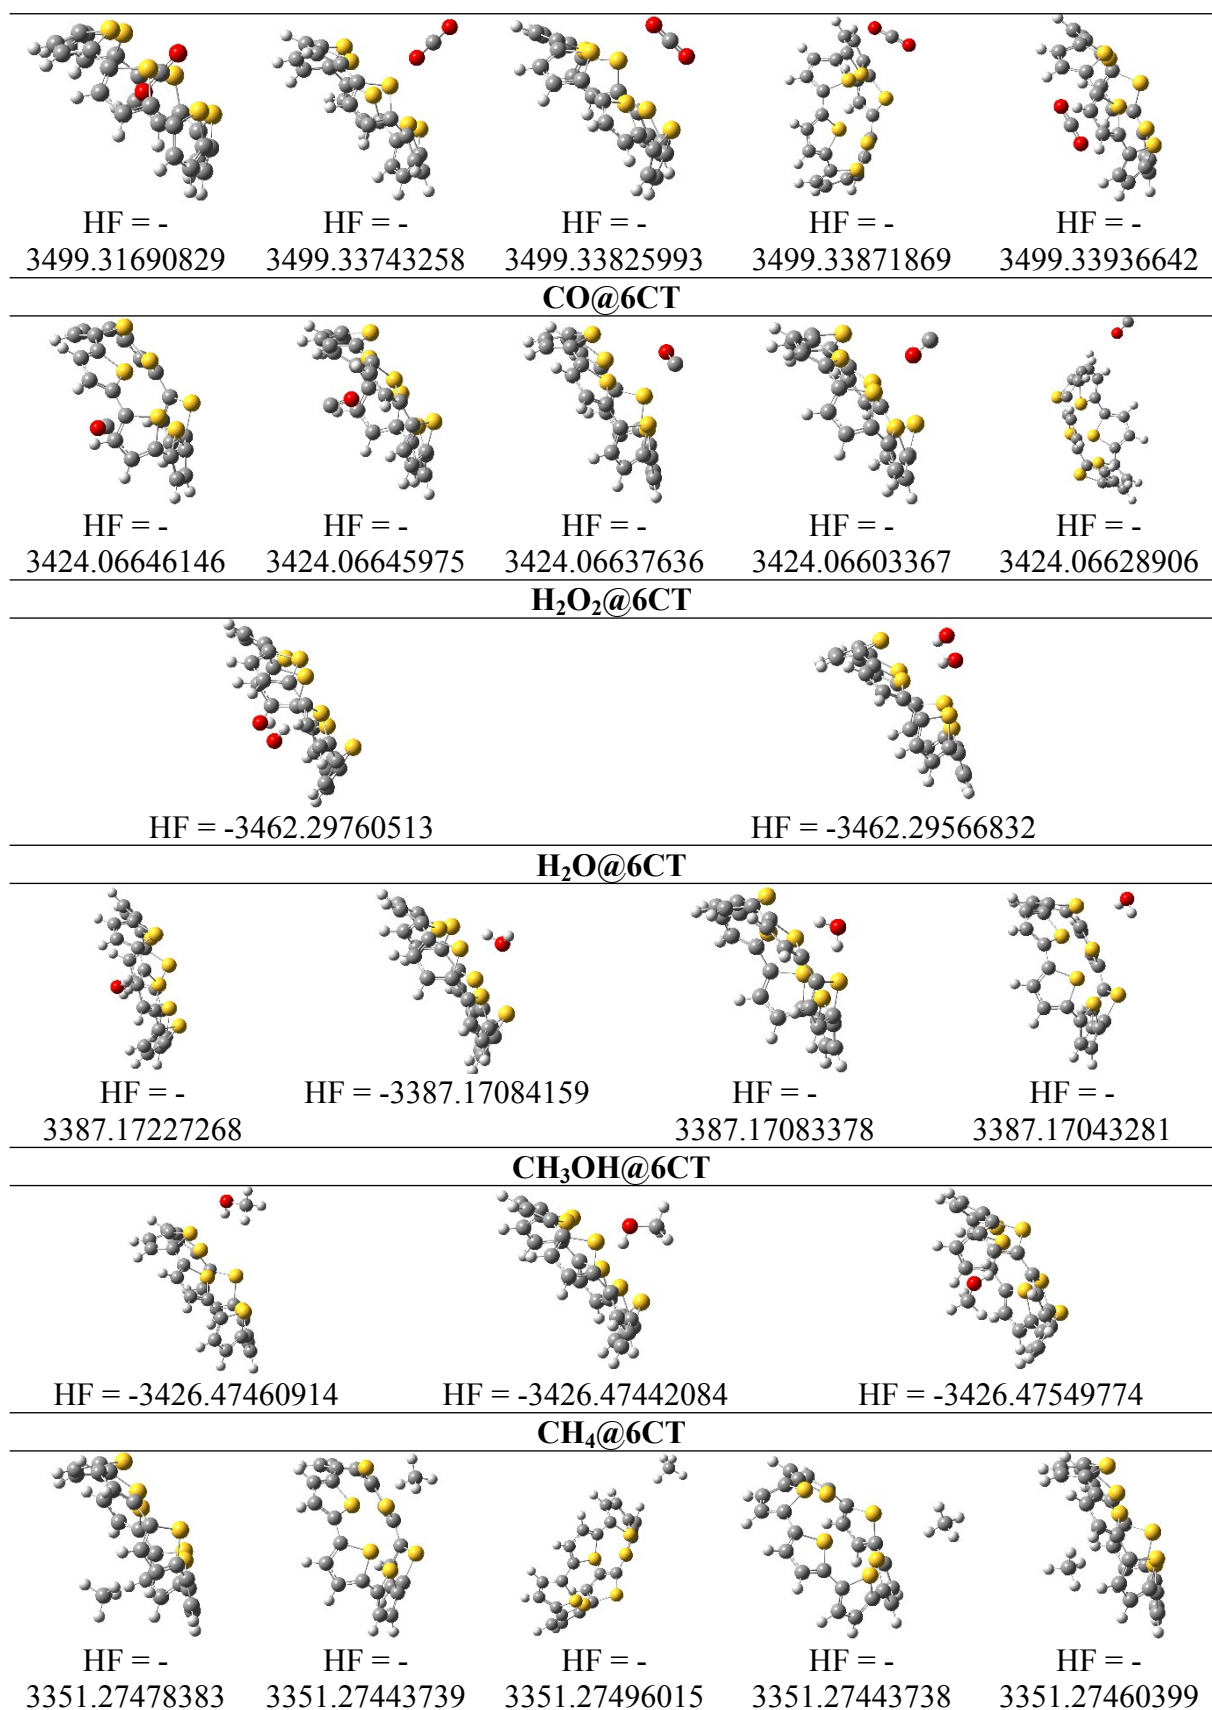

**Figure S2b.** Optimized geometries of analytes@6CT complexes

---

**NH<sub>3</sub>@7CT**

---

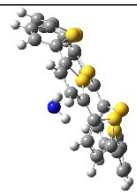

HF = -  
3919.15789

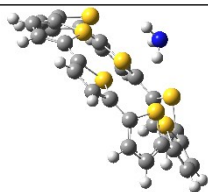

HF = -3919.1561899

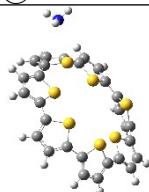

HF = -  
3919.1588129

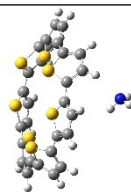

HF = -  
3919.158545

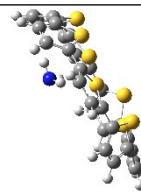

HF = -  
3919.30088573

---

**N<sub>2</sub>H<sub>4</sub>@7CT**

---

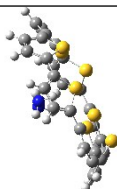

HF = -3974.46863966

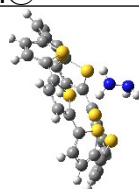

HF = -3974.46597895

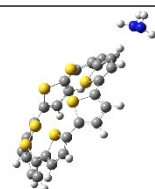

HF = -  
3974.46641649

---

**HCN@7CT**

---

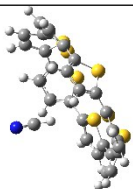

HF = -  
3956.0322947

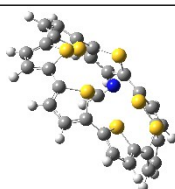

HF = -  
3956.03081051

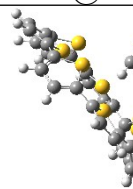

HF = -  
3956.03081051

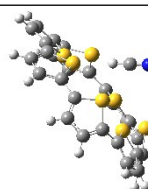

HF = -  
3956.03081044

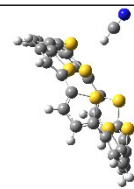

HF = -  
3956.03155763

---

**H<sub>2</sub>S@7CT**

---

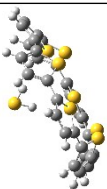

HF = -3956.03155763

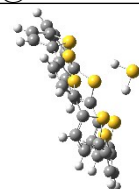

HF = -4261.99193257

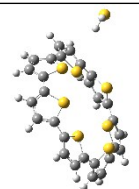

HF = -  
4261.99236617

---

**SO<sub>2</sub>@7CT**

---

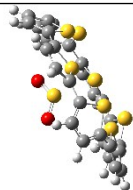

HF = -4411.19697972

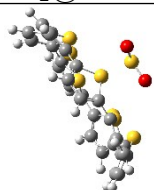

HF = -4411.19520905

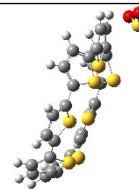

HF = -4411.19812346

---

**SO<sub>3</sub>@7CT**

---

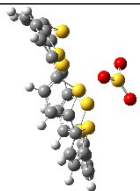

HF = -  
4486.36783551

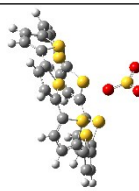

HF = -  
4486.36783550

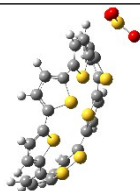

HF = -  
4486.37446891

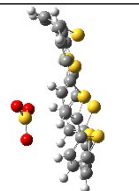

HF = -4486.37157432

---

**CO<sub>2</sub>@7CT**

---

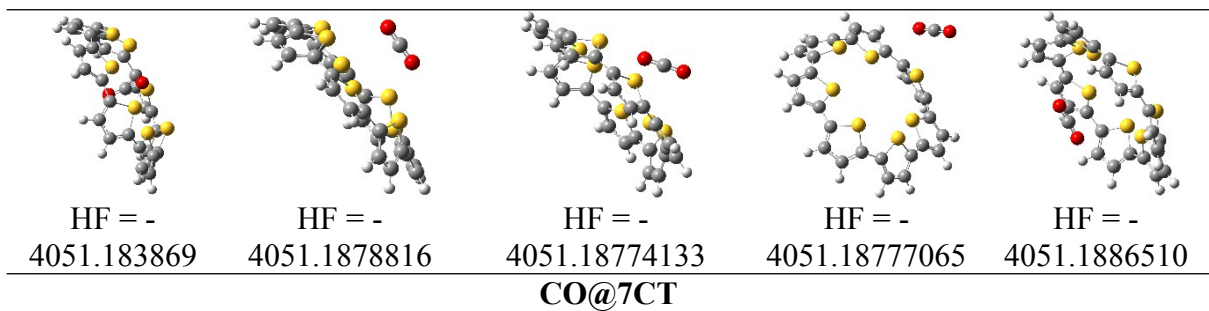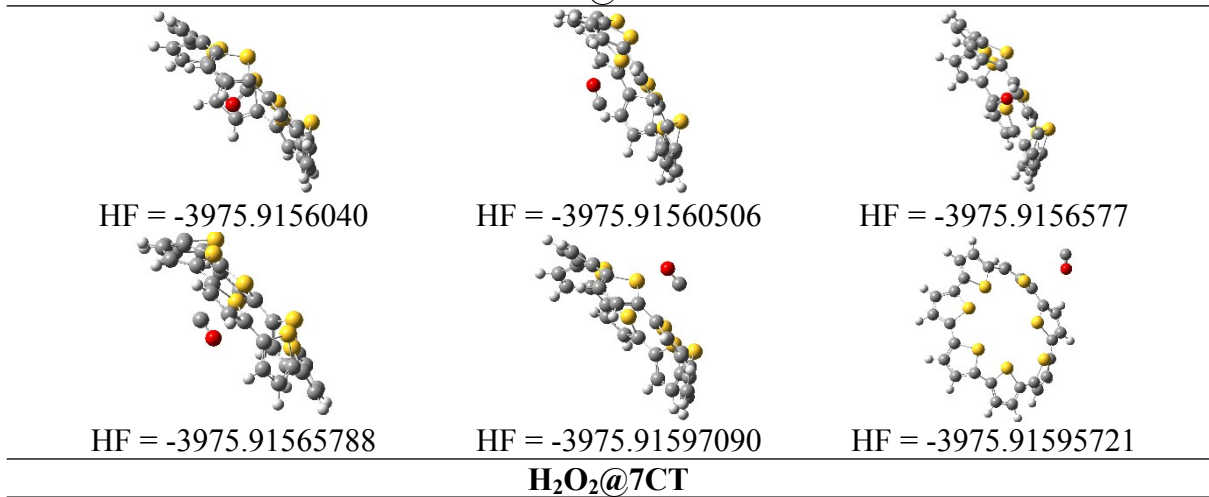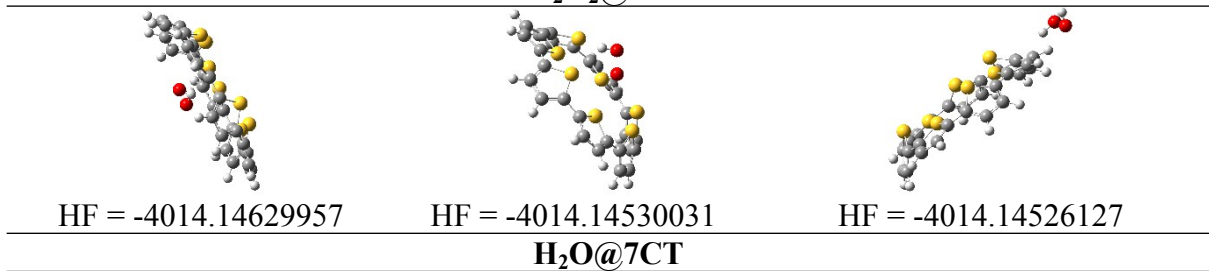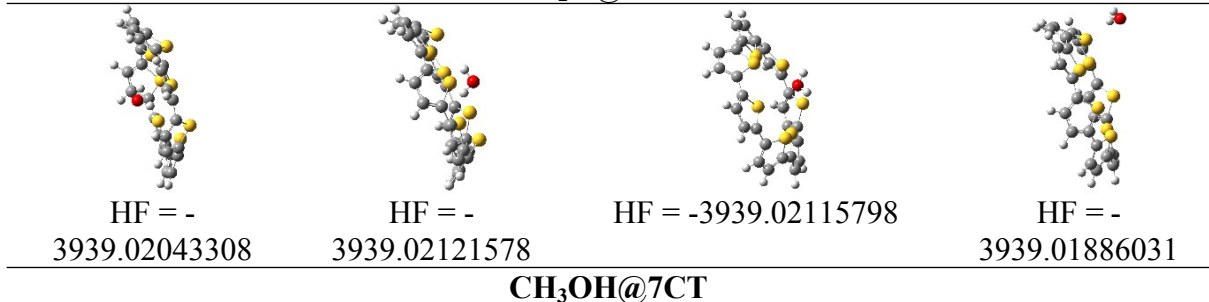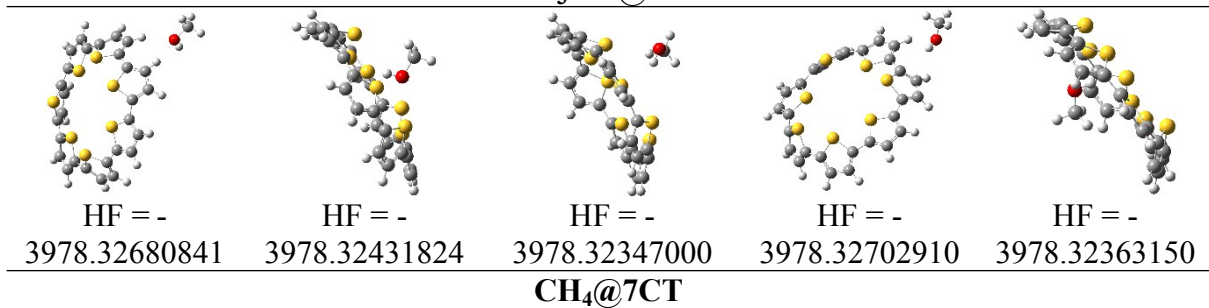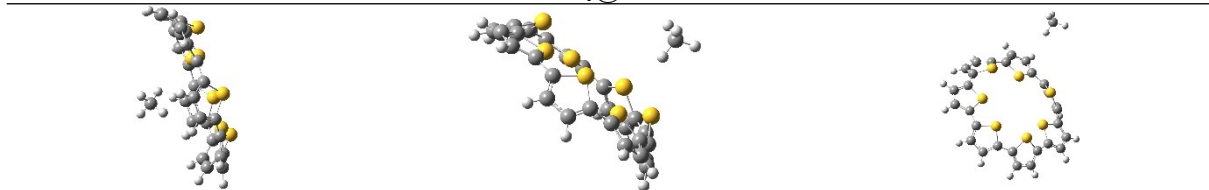



---

HF = -3903.12379933

HF = -3903.12374938

HF = -3903.12413762

---

**Figure S2c.** Optimized geometries of analytes@7CT complexes

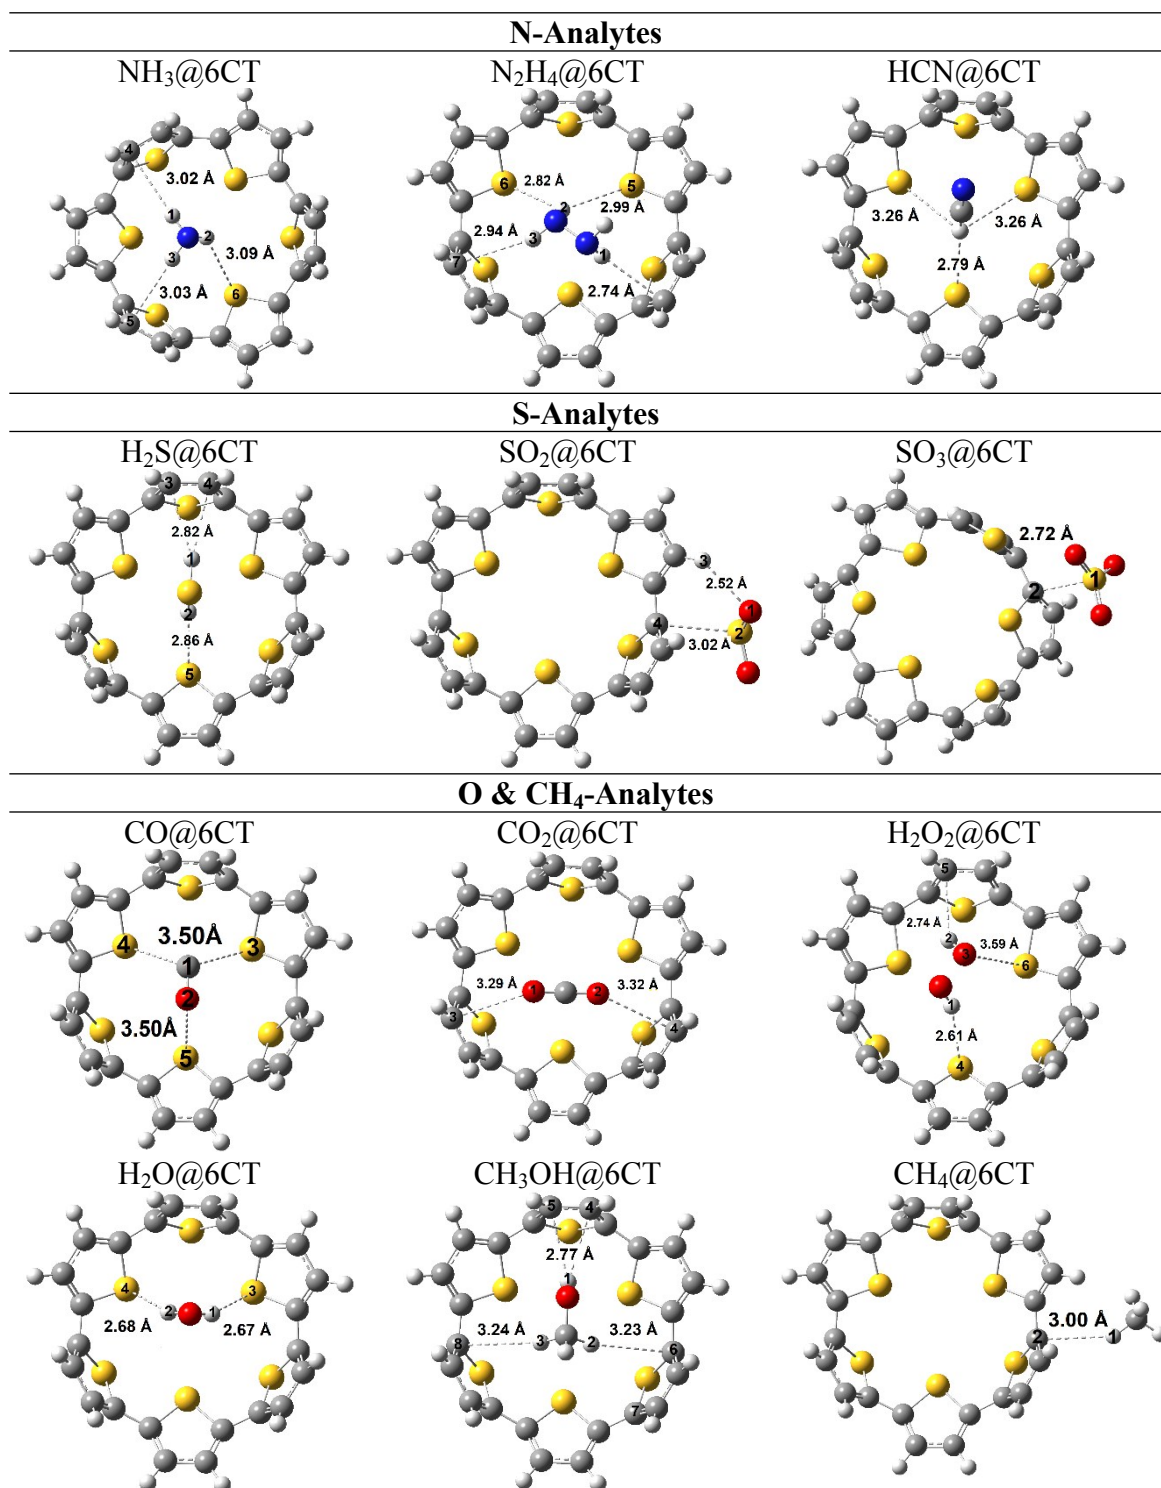

**Figure S3a.** The most stable geometries of analytes@6CT complexes. In grey: C; yellow: S; white: H; red: O and blue: N

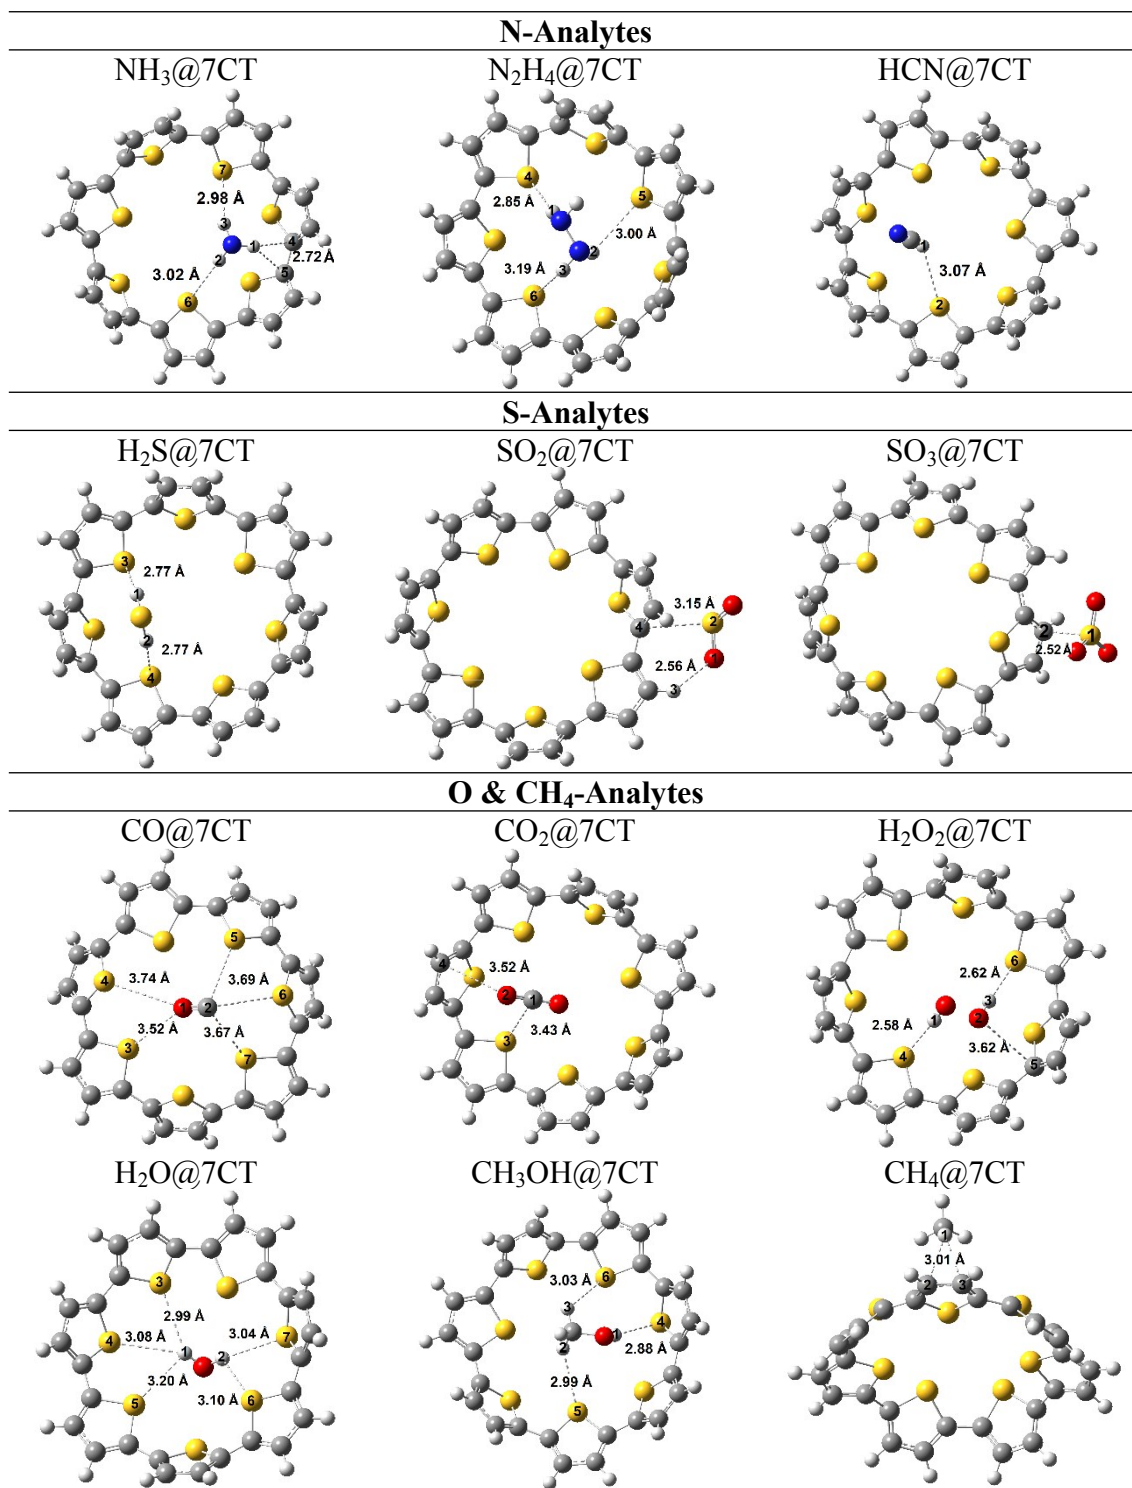

**Figure S3b.** The most stable geometries of analytes@7CT complexes. In grey: C; yellow: S; white: H; red: O and blue: N

## N-Analytes

### NH<sub>3</sub>@6CT

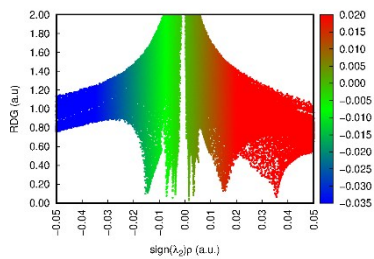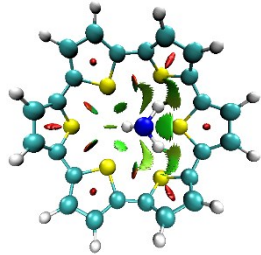

### N<sub>2</sub>H<sub>4</sub>@6CT

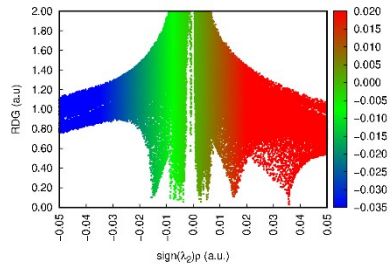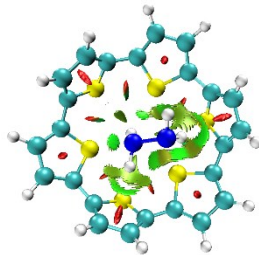

### HCN@6CT

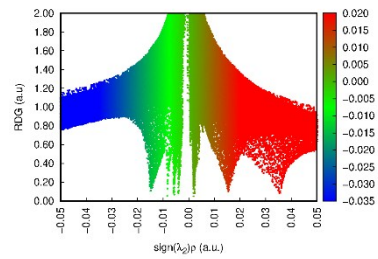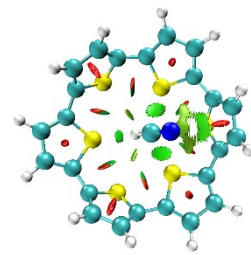

## S-Analytes

### H<sub>2</sub>S@6CT

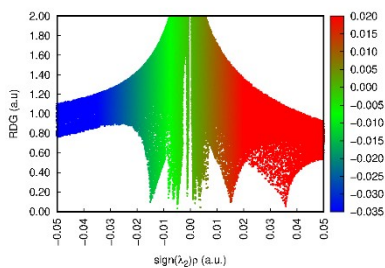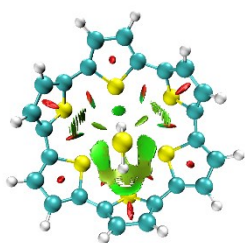

### SO<sub>2</sub>@6CT

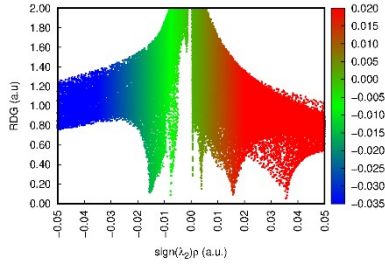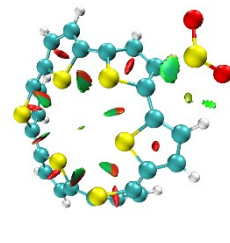

### SO<sub>3</sub>@6CT

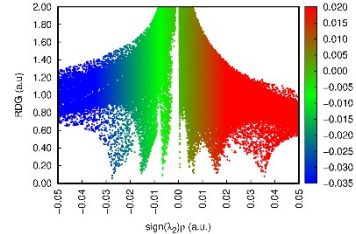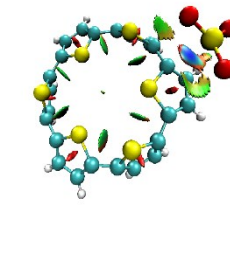

## O & CH<sub>4</sub>-Analytes

### CO@6CT

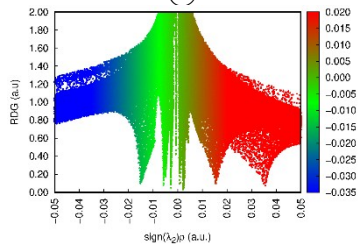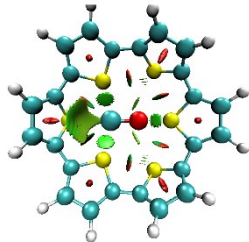

### CO<sub>2</sub>@6CT

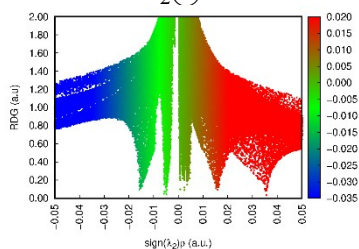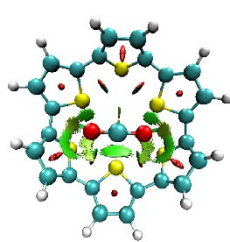

### H<sub>2</sub>O<sub>2</sub>@6CT

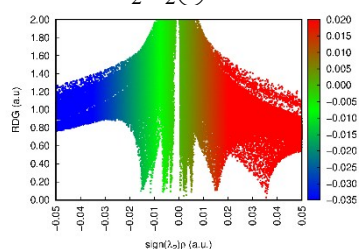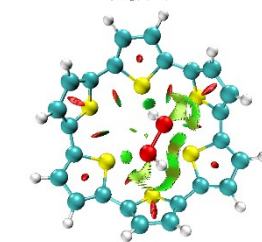

### H<sub>2</sub>O@6CT

### CH<sub>3</sub>OH@6CT

### CH<sub>4</sub>@6CT

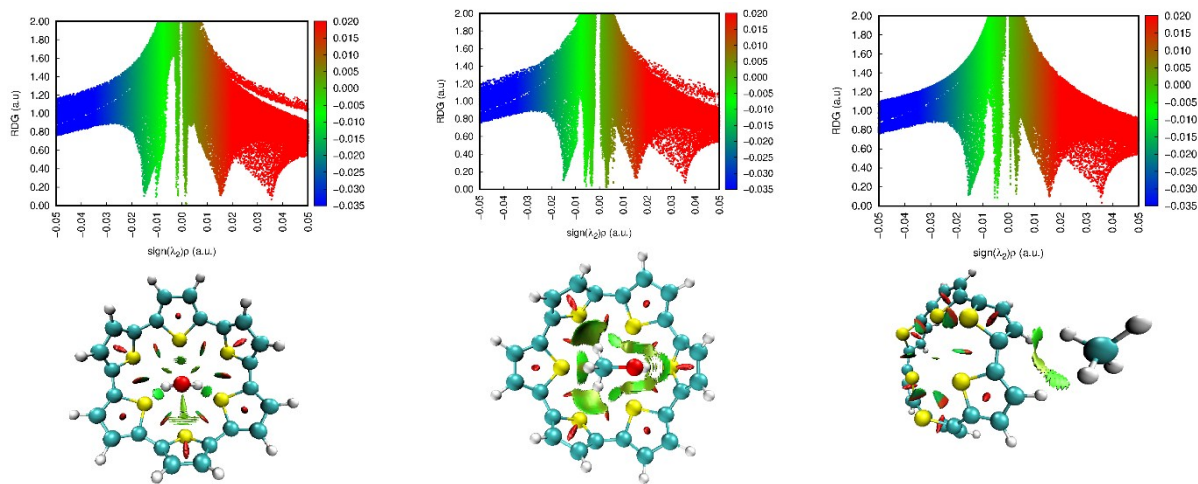

**Figure S4a.** NCI index with isovalue = 0.5 au and plot of reduced density gradient (RDG) versus  $\text{sign}(\lambda_2)\rho(r)$  of analytes@6CT complexes.



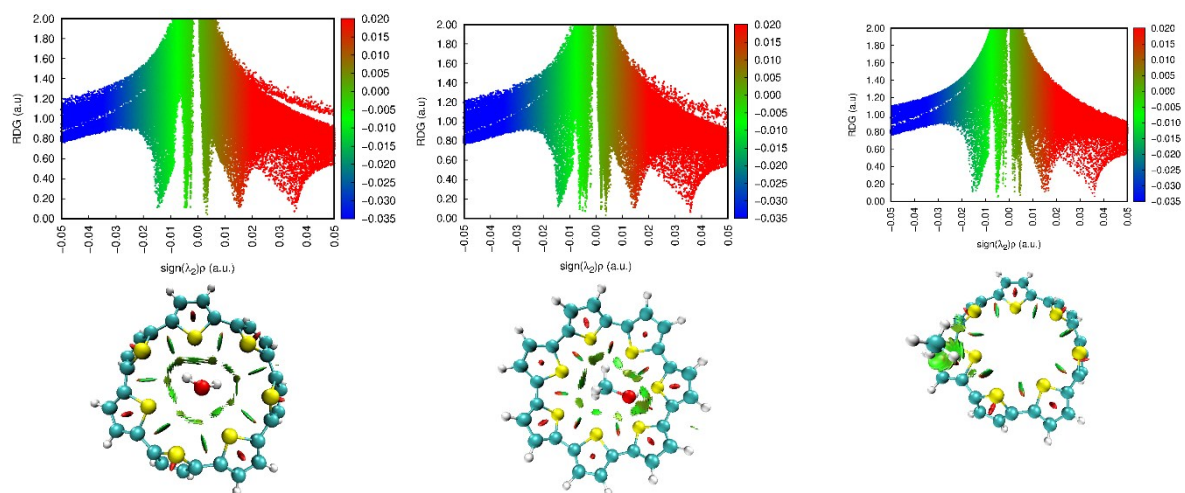

**Figure S4b.** NCI index with isovalue = 0.5 au and plot of reduced density gradient (RDG) versus  $\text{sign}(\lambda_2)\rho(r)$  of analytes@7CT complexes.

## Pure nCT

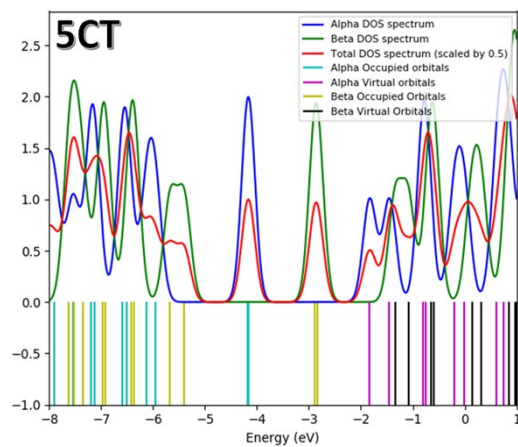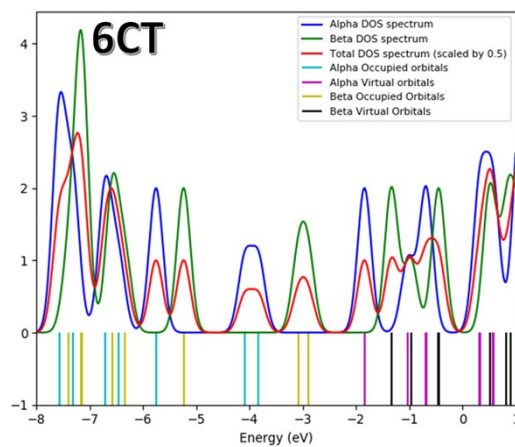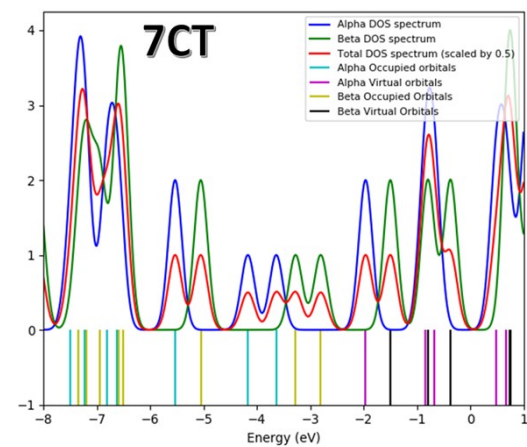

## N-Analytes

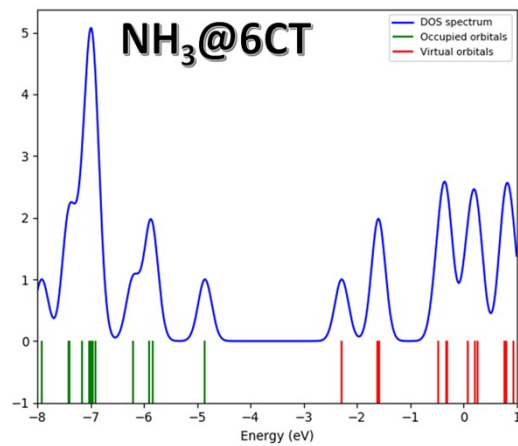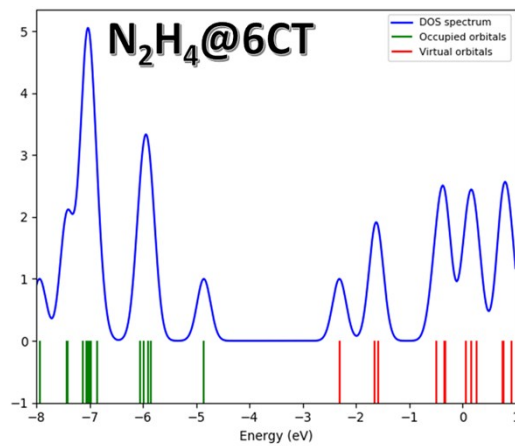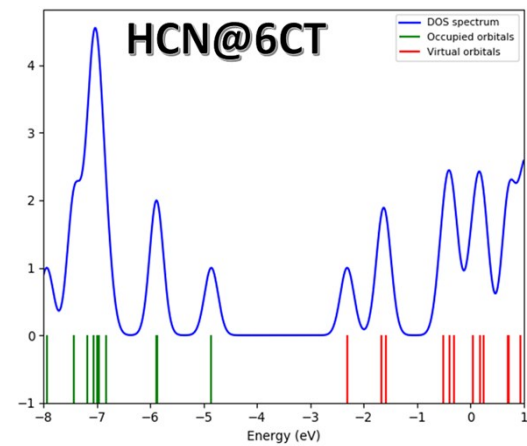

## S-Analytes



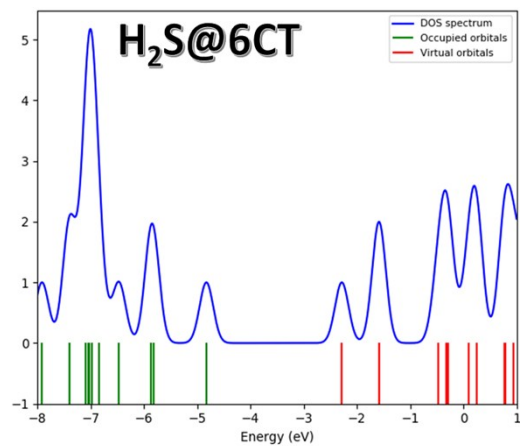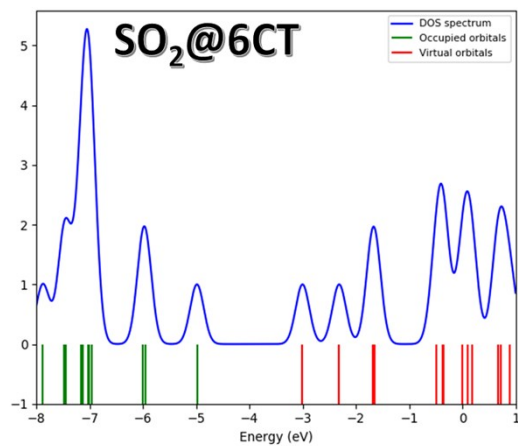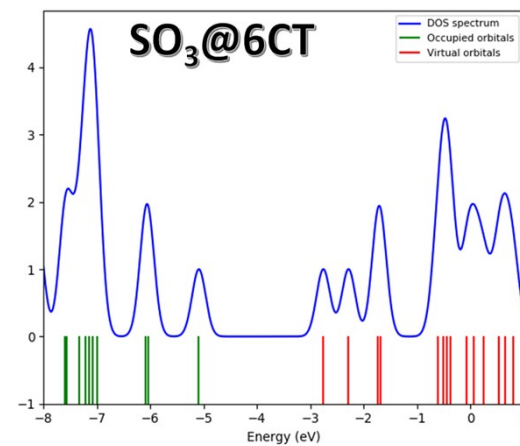

### O & CH<sub>4</sub>-Analytes

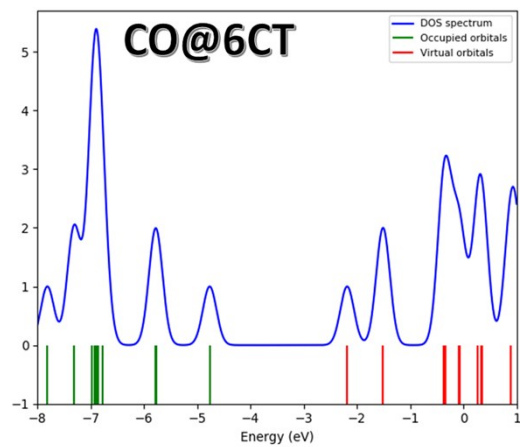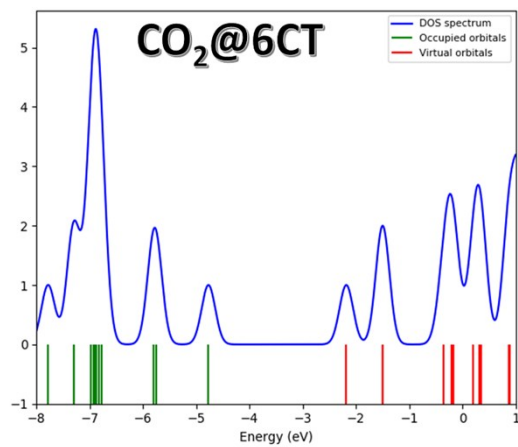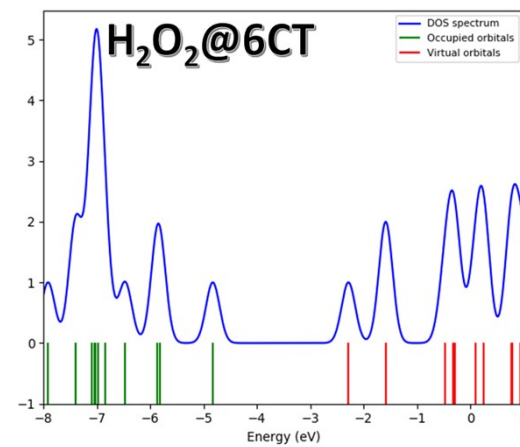

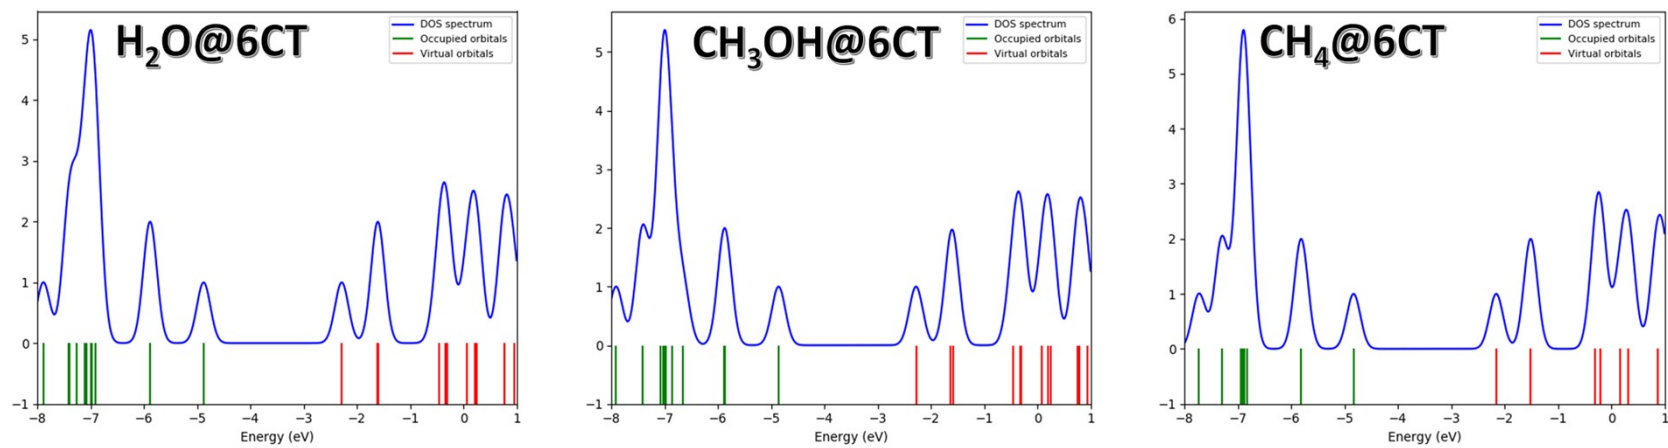

**Figure S5a.** DOS spectra of pure nCT and analytes@6CT complexes.

## N-Analytes

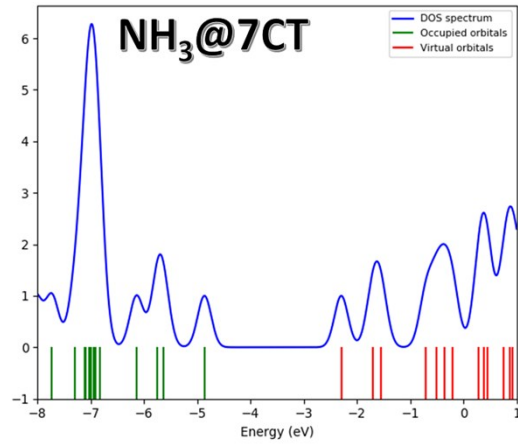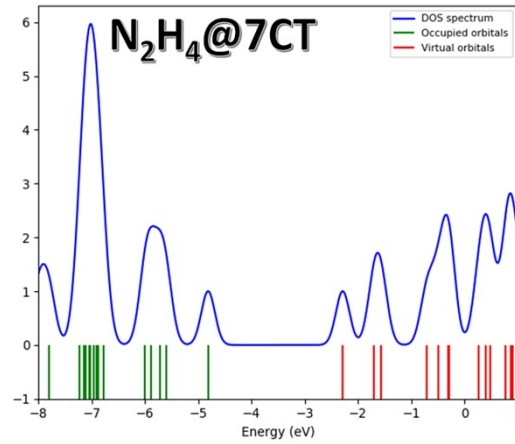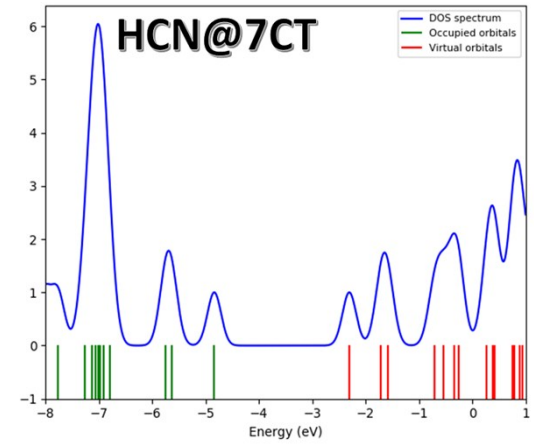

## S-Analytes

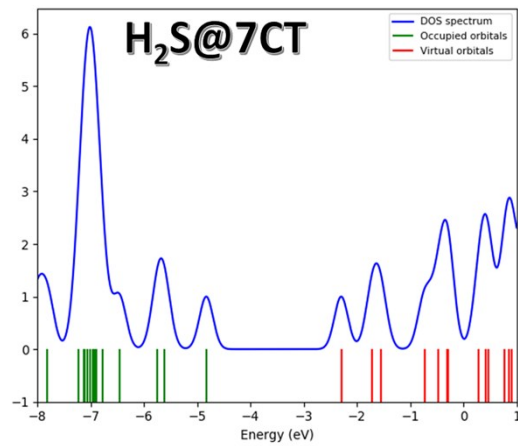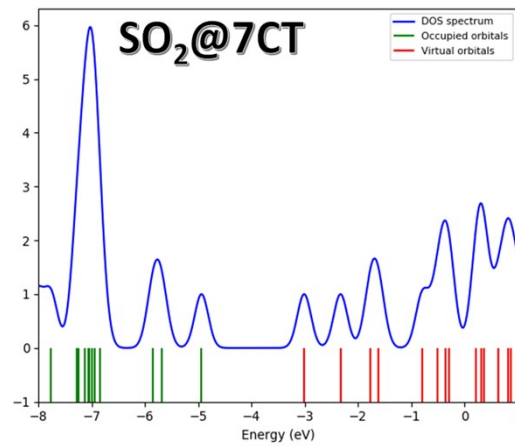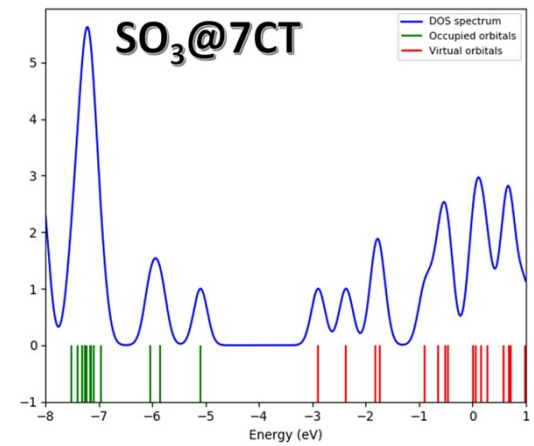

## O & CH<sub>4</sub>-Analytes

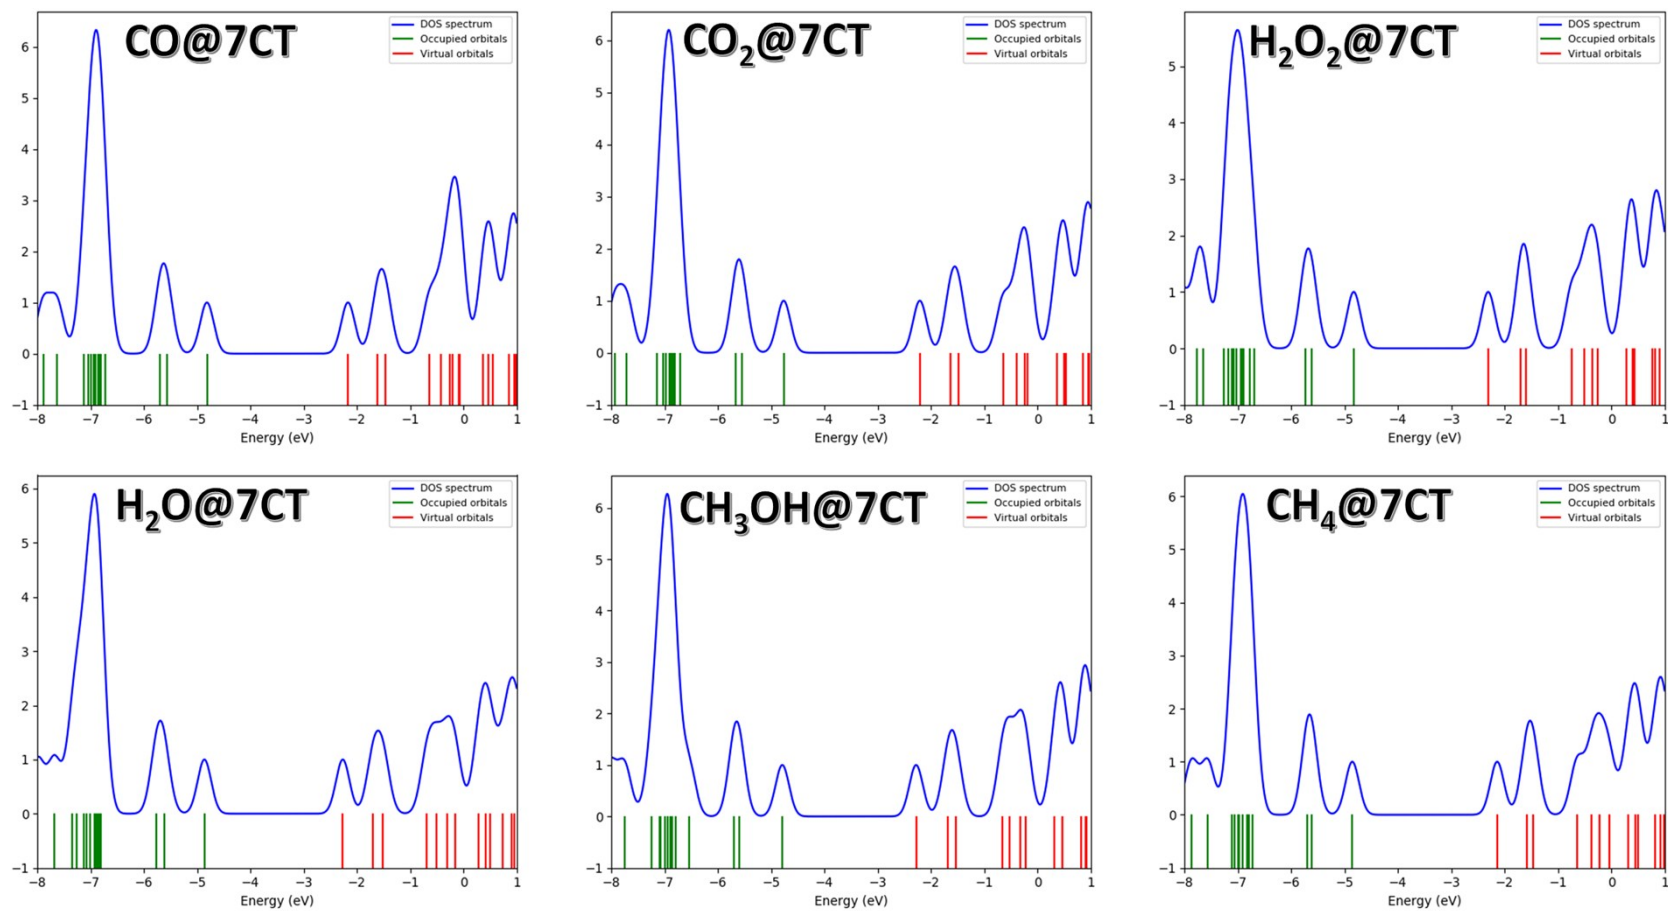

Figure S5b. DOS spectra of analytes@7CT complexes.

**Table S1.** Excited states and their transitions.

| Complexes                             | Excited state | Major excitations              | Complexes                             | Excited state | Major excitations     |
|---------------------------------------|---------------|--------------------------------|---------------------------------------|---------------|-----------------------|
| <b>Pure nCT</b>                       |               |                                | <b>CH<sub>4</sub>-Analyte</b>         |               |                       |
| <b>5CT</b>                            | 12            | H-1→L+1<br>H→L                 | <b>CH<sub>4</sub>@5CT</b>             | 6             | H-1→L<br>H→L+1        |
| <b>6CT</b>                            | 14            | H-1→L<br>H→L+1                 | <b>CH<sub>4</sub>@6CT</b>             | 7             | H-2→L<br>H→L+2        |
| <b>7CT</b>                            | 12            | H-1→L<br>H-1→L+1<br>H→L, H→L+1 | <b>CH<sub>4</sub>@7CT</b>             | 8             | H-1→L<br>H→L+1        |
| <b>N-Analytes</b>                     |               |                                | <b>S-Analytes</b>                     |               |                       |
| <b>NH<sub>3</sub>@5CT</b>             | 6             | H-1→L<br>H→L+1                 | <b>H<sub>2</sub>S@5CT</b>             | 6             | H-1→L<br>H→L+1        |
| <b>NH<sub>3</sub>@6CT</b>             | 7             | H-2→L<br>H→L+2                 | <b>H<sub>2</sub>S@6CT</b>             | 7             | H-2→L<br>H→L+1, H→L+2 |
| <b>NH<sub>3</sub>@7CT</b>             | 7             | H-1→L<br>H→L+1                 | <b>H<sub>2</sub>S@7CT</b>             | 7             | H-1→L<br>H→L+1        |
| <b>N<sub>2</sub>H<sub>4</sub>@5CT</b> | 6             | H-1→L<br>H→L+1                 | <b>SO<sub>2</sub>@5CT</b>             | 5             | H-1→L<br>H→L, H→L+2   |
| <b>N<sub>2</sub>H<sub>4</sub>@6CT</b> | 7             | H-1→L<br>H→L+1                 | <b>SO<sub>2</sub>@6CT</b>             | 3             | H→L<br>H→L+1          |
| <b>N<sub>2</sub>H<sub>4</sub>@7CT</b> | 7             | H-1→L<br>H→L+1                 | <b>SO<sub>2</sub>@7CT</b>             | 3             | H→L                   |
| <b>HCN@5CT</b>                        | 6             | H-1→L<br>H→L+1                 | <b>SO<sub>3</sub>@5CT</b>             | 12            | H-3→L<br>H-2→L+1      |
| <b>HCN@6CT</b>                        | 6             | H-1→L<br>H→L+1                 | <b>SO<sub>3</sub>@6CT</b>             | 6             | H-2→L<br>H→L, H→L+1   |
| <b>HCN@7CT</b>                        | 7             | H-1→L<br>H→L+1                 | <b>SO<sub>3</sub>@7CT</b>             | 6             | H-1→L<br>H→L, H→L+1   |
| <b>O-Analytes</b>                     |               |                                |                                       |               |                       |
| <b>CO@5CT</b>                         | 6             | H-1→L<br>H→L+1                 | <b>H<sub>2</sub>O<sub>2</sub>@5CT</b> | 6             | H-1→L<br>H→L+1        |
| <b>CO@6CT</b>                         | 7             | H-1→L<br>H→L+2                 | <b>H<sub>2</sub>O<sub>2</sub>@6CT</b> | 7             | H-1→L<br>H→L+2        |
| <b>CO@7CT</b>                         | 8             | H-1→L<br>H→L+1                 | <b>H<sub>2</sub>O<sub>2</sub>@7CT</b> | 7             | H-1→L<br>H→L+1        |
| <b>CO<sub>2</sub>@5CT</b>             | 6             | H-1→L<br>H→L+1                 | <b>H<sub>2</sub>O@5CT</b>             | 6             | H-1→L<br>H→L+1        |
| <b>CO<sub>2</sub>@6CT</b>             | 7             | H-1→L<br>H→L+2                 | <b>H<sub>2</sub>O@6CT</b>             | 7             | H-1→L<br>H→L+1        |
| <b>CO<sub>2</sub>@7CT</b>             | 7             | H-1→L<br>H→L+1                 | <b>H<sub>2</sub>O@7CT</b>             | 7             | H-1→L<br>H→L+1        |
| <b>CH<sub>3</sub>OH@5CT</b>           | 6             | H-1→L<br>H→L+1                 | <b>CH<sub>3</sub>OH@7CT</b>           | 7             | H-1→L<br>H→L+1        |
| <b>T</b>                              |               |                                | <b>T</b>                              |               |                       |
| <b>CH<sub>3</sub>OH@6CT</b>           | 7             | H-1→L<br>H→L+2                 |                                       |               |                       |
| <b>T</b>                              |               |                                |                                       |               |                       |

**Table S2a.** Molecular volume, molecular size and dipole moment of analyte@nCT complexes.

| Species                            | Volume (cm <sup>3</sup> mol <sup>-1</sup> ) | Sizes (Å) | Dipole (Debye) |
|------------------------------------|---------------------------------------------|-----------|----------------|
| <b>N-Analytes</b>                  |                                             |           |                |
| NH <sub>3</sub> @5CT               | 268.216                                     | 9.59      | 3.2940         |
| NH <sub>3</sub> @6CT               | 339.873                                     | 10.35     | 3.6315         |
| NH <sub>3</sub> @7CT               | 416.326                                     | 12.94     | 3.2483         |
| N <sub>2</sub> H <sub>4</sub> @5CT | 274.716                                     | 9.69      | 3.7381         |
| N <sub>2</sub> H <sub>4</sub> @6CT | 358.244                                     | 10.37     | 3.4757         |
| N <sub>2</sub> H <sub>4</sub> @7CT | 370.881                                     | 12.92     | 3.5397         |
| HCN@5CT                            | 259.062                                     | 9.62      | 2.2481         |
| HCN@6CT                            | 348.665                                     | 10.33     | 3.5638         |
| HCN@7CT                            | 403.569                                     | 12.92     | 3.3116         |
| <b>S-Analytes</b>                  |                                             |           |                |
| H <sub>2</sub> S@5CT               | 294.923                                     | 9.62      | 3.7801         |
| H <sub>2</sub> S@6CT               | 328.065                                     | 10.29     | 4.1174         |
| H <sub>2</sub> S@7CT               | 375.843                                     | 12.94     | 3.7455         |
| SO <sub>2</sub> @5CT               | 295.406                                     | 9.70      | 7.2809         |
| SO <sub>2</sub> @6CT               | 394.953                                     | 10.48     | 5.2700         |
| SO <sub>2</sub> @7CT               | 314.977                                     | 12.99     | 5.2986         |
| SO <sub>3</sub> @5CT               | 304.345                                     | 8.96      | 19.6032        |
| SO <sub>3</sub> @6CT               | 337.219                                     | 10.42     | 8.6282         |
| SO <sub>3</sub> @7CT               | 369.713                                     | 13.01     | 8.1515         |
| <b>O-Analytes</b>                  |                                             |           |                |
| CO@5CT                             | 255.457                                     | 9.62      | 4.8164         |
| CO@6CT                             | 382.382                                     | 10.398    | 5.1459         |
| CO@7CT                             | 416.513                                     | 13.00     | 4.8044         |
| CO <sub>2</sub> @5CT               | 290.847                                     | 9.68      | 4.7940         |
| CO <sub>2</sub> @6CT               | 268.465                                     | 10.42     | 5.2155         |
| CO <sub>2</sub> @7CT               | 406.927                                     | 12.97     | 5.0427         |
| H <sub>2</sub> O <sub>2</sub> @5CT | 273.056                                     | 9.67      | 3.1892         |
| H <sub>2</sub> O <sub>2</sub> @6CT | 364.082                                     | 10.32     | 3.2242         |
| H <sub>2</sub> O <sub>2</sub> @7CT | 459.124                                     | 12.899    | 3.3459         |
| H <sub>2</sub> O@5CT               | 281.19                                      | 9.66      | 3.3800         |
| H <sub>2</sub> O@6CT               | 325.455                                     | 10.38     | 3.3765         |
| H <sub>2</sub> O@7CT               | 357.102                                     | 13.02     | 6.4734         |
| CH <sub>3</sub> OH@5CT             | 312.762                                     | 9.59      | 3.2136         |
| CH <sub>3</sub> OH@6CT             | 285.474                                     | 10.35     | 3.6679         |
| CH <sub>3</sub> OH@7CT             | 372.592                                     | 12.91     | 4.1316         |
| <b>CH<sub>4</sub>-Analytes</b>     |                                             |           |                |
| CH <sub>4</sub> @5CT               | 322.43                                      | 9.71      | 4.8514         |
| CH <sub>4</sub> @6CT               | 326.62                                      | 10.46     | 4.9313         |
| CH <sub>4</sub> @7CT               | 436.47                                      | 13.03     | 4.5350         |

**Table S2b.** Molecular volume, molecular size and dipole moment of isolated nCT and isolated analytes.

|                                   | <b>Volume (cm<sup>3</sup> mol<sup>-1</sup>)</b> | <b>Sizes (Å)</b> | <b>Dipole moment (Debye)</b> |
|-----------------------------------|-------------------------------------------------|------------------|------------------------------|
| <b>5CT</b>                        | 272.5                                           | 7.94             | 5.74                         |
| <b>6CT</b>                        | 308.35                                          | 9.09             | 6.56                         |
| <b>7CT</b>                        | 352.84                                          | 11.63            | 7.02                         |
| <b>NH<sub>3</sub></b>             | 23.65                                           | 1.64             | 1.76                         |
| <b>N<sub>2</sub>H<sub>4</sub></b> | 29.93                                           | 2.38             | 0.0002                       |
| <b>HCN</b>                        | 30.45                                           | 2.23             | 3.07                         |
| <b>H<sub>2</sub>S</b>             | 27.61                                           | 1.95             | 1.41                         |
| <b>SO<sub>2</sub></b>             | 34.18                                           | 2.52             | 1.99                         |
| <b>SO<sub>3</sub></b>             | 36.81                                           | 2.52             | 0.0002                       |
| <b>CO<sub>2</sub></b>             | 32.33                                           | 2.34             | 0.00                         |
| <b>CO</b>                         | 33.62                                           | 1.14             | 0.03                         |
| <b>H<sub>2</sub>O<sub>2</sub></b> | 24.51                                           | 1.99             | 3.46                         |
| <b>H<sub>2</sub>O</b>             | 12.40                                           | 1.54             | 2.19                         |
| <b>CH<sub>3</sub>OH</b>           | 32.94                                           | 2.37             | 1.90                         |
| <b>CH<sub>4</sub></b>             | 23.51                                           | 1.785            | 0.00002                      |
